# Supplementary material for: Constitutive Behavior of an AA4032 Piston Alloy with Cu and Er Additions upon High-Temperature Compressive Deformation
Source: Springer Nature journal article supplement (doi:10.1007/s11661-019-05482-9), 2019-10-25
Supplement: MOESM1 [file 17322194]

## Supplementary material for

### **Constitutive behavior of an AA4032 piston alloy with Cu and Er additions upon high temperature compressive deformation**

Suwaree Chankitmunkong<sup>1, 2, a\*</sup>, Dmitry G. Eskin<sup>2, 3, b</sup>, and Chaowalit Limmaneevichitr<sup>1, c</sup>

<sup>1</sup>Department of Production Engineering, Faculty of Engineering, King Mongkut's University of Technology Thonburi, 126 Pracha-Uttd Rd., Bangmod, Tungkhru, Bangkok, 10140 Thailand

<sup>2</sup>Brunel University London, BCAST, Uxbridge, Middlesex UB8 3PH, United Kingdom

<sup>3</sup>Tomsk State University, Tomsk 634050, Russian Federation

<sup>a\*</sup> Corresponding author: suwaree.03@mail.kmutt.ac.th, [dmitry.eskin@brunel.ac.uk](mailto:dmitry.eskin@brunel.ac.uk),

<sup>c</sup>chaowalit.lim@mail.kmutt.ac.th

Polynomial regression coefficients of three experimental alloys in Eqs. (13)-(16);

$$n' = a_0 + a_1\varepsilon + a_2\varepsilon^2 + a_3\varepsilon^3 + a_4\varepsilon^4 + a_5\varepsilon^5 + a_6\varepsilon^6 \quad (13)$$

$$\alpha = b_0 + b_1\varepsilon + b_2\varepsilon^2 + b_3\varepsilon^3 + b_4\varepsilon^4 + b_5\varepsilon^5 + b_6\varepsilon^6 \quad (14)$$

$$\beta = c_0 + c_1\varepsilon + c_2\varepsilon^2 + c_3\varepsilon^3 + c_4\varepsilon^4 + c_5\varepsilon^5 + c_6\varepsilon^6 \quad (15)$$

$$Q = d_0 + d_1\varepsilon + d_2\varepsilon^2 + d_3\varepsilon^3 + d_4\varepsilon^4 + d_5\varepsilon^5 + d_6\varepsilon^6 \quad (16)$$

**Table S1** Polynomial regression coefficient results of  $n'$ ,  $\alpha$ ,  $\beta$ ,  $Q$ 

| Coefficient<br>$n'$ | Values   |           |             | Coefficient<br>$\alpha$ | Values |        |             |
|---------------------|----------|-----------|-------------|-------------------------|--------|--------|-------------|
|                     | 1Cu      | 3.5Cu     | 3.5Cu+0.4Er |                         | 1Cu    | 3.5Cu  | 3.5Cu+0.4Er |
| $a_0$               | 10.36    | 15.15     | 11.04       | $b_0$                   | 0.02   | 0.02   | 0.02        |
| $a_1$               | -78.33   | -170.07   | -95.17      | $b_1$                   | -0.25  | -0.17  | -0.24       |
| $a_2$               | 614.27   | 1413.15   | 745.81      | $b_2$                   | 2.28   | 1.62   | 2.24        |
| $a_3$               | -2469.20 | -5971.75  | -2979.65    | $b_3$                   | -9.92  | -7.15  | -9.79       |
| $a_4$               | 5381.76  | 13529.68  | 6435.10     | $b_4$                   | 22.76  | 16.48  | 22.44       |
| $a_5$               | -6044.82 | -15625.16 | -7151.64    | $b_5$                   | -26.38 | -19.10 | -25.93      |
| $a_6$               | 2742.16  | 7219.06   | 3207.56     | $b_6$                   | 12.17  | 8.80   | 11.90       |

| coefficient<br>$\beta$ | Values  |         |             | Coefficient<br>$Q$ | Values  |         |             |
|------------------------|---------|---------|-------------|--------------------|---------|---------|-------------|
|                        | 1Cu     | 3.5Cu   | 3.5Cu+0.4Er |                    | 1Cu     | 3.5Cu   | 3.5Cu+0.4Er |
| $c_0$                  | 0.21    | 0.23    | 0.20        | $d_0$              | 0.21    | 0.23    | 0.20        |
| $c_1$                  | -2.92   | -3.48   | -2.95       | $d_1$              | -2.92   | -3.48   | -2.95       |
| $c_2$                  | 25.13   | 30.64   | 25.51       | $d_2$              | 25.13   | 30.64   | 25.51       |
| $c_3$                  | -106.97 | -132.40 | -108.34     | $d_3$              | -106.97 | -132.40 | -108.34     |
| $c_4$                  | 242.33  | 303.24  | 244.20      | $d_4$              | 242.33  | 303.24  | 244.20      |
| $c_5$                  | -278.94 | -351.89 | -279.37     | $d_5$              | -278.94 | -351.89 | -279.37     |
| $c_6$                  | 128.29  | 162.81  | 127.63      | $d_6$              | 128.29  | 162.81  | 127.63      |
